# Supplementary material
Source: publisher figshare collection journal article supplement (https://future-science-group.figshare.com/ndownloader/files/31697942)
Supplement: Supplementary file 1 [file 31697942]

**Supplementary materials**

**
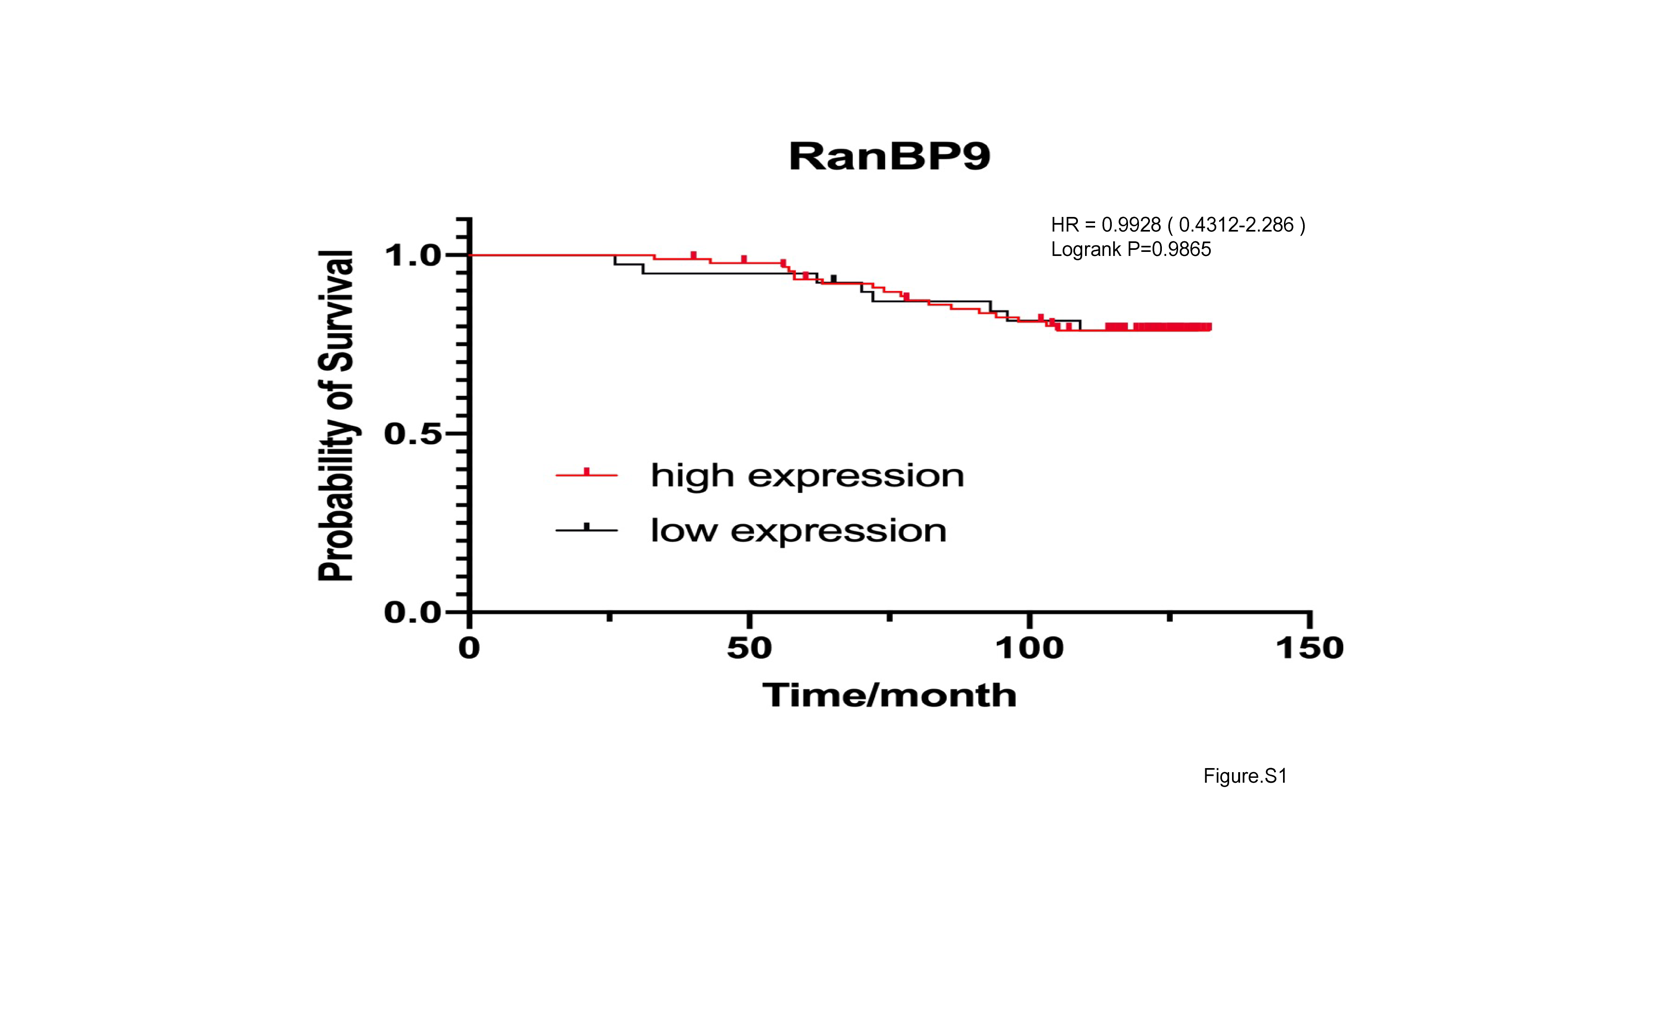
**

**Figure S1. OS of breast cancer patients grouped by RanBP9 expression**

**
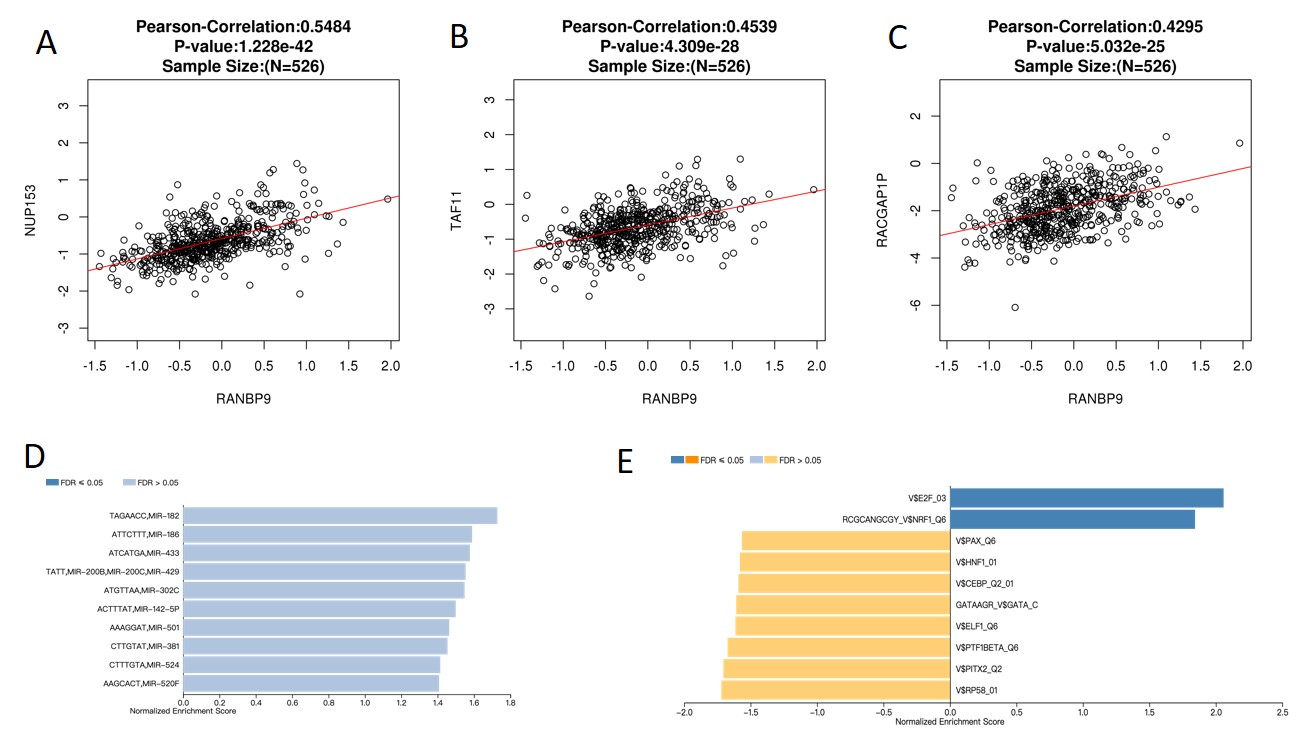
**

**Figure S2. Gene expression correlation analysis of RanBP9 functional networks in BRCA (LinkedOmics)**

(A-C) The scatter plot shows Pearson correlation of RanBP9 expression with expression of NUP153, TAF11, and RACGAP1P. (D) miRNA-target networks of RanBP9. (E) Transcription factor-target networks of RanBP9.
